# Supplementary material for: Urban Agriculture in Latin America: A Green Culture Beyond Growing and Feeding
Source: Frontiers journal article supplement (doi:10.3389/frsc.2021.792616), 2022-02-17
Supplement: Data_Sheet_1.docx [file Data_Sheet_1.docx]

Appendix 1

| **Sustaintability domains** | **Cascade1, MA2 and IPBES3 frameworks** | **TEEB framework4** |
| --- | --- | --- |
| Environment | Biophysical structure, process and functions1 | Regulating Services4 |
|
| Habitat or Support4 |
|
| Ecosystems services1 | Provisioning4 |
|
| Cultural4 |
|
| Social | Benefits2 | Health (nutrition, mental, emotional) |
| Food Security |
| Identity and Social Cohesion |
| Assests3 | Demographic information of urban farmers* |
| Training and Technical Support |
| Academy engagement |
| Economics | Benefits2 | Expense reduction |
| Employment |
| Value Chain (production**, processing, transport, market/trade) |
| Assests3 | Incentive payments and credits |
| Technology and infrastructure |
| Institutional funds |
| Governance and Policy | Indirect Drivers2,3 | Laws and environmental regulation |
| Tenure and land use planning |
| Self/Community-based-organization |
| Public Government engagement |
| NGOs, International agencies |
| Private participation |
| * no used in windroses figure (value chain definition in texts Boue 2018) | | |
| ** except urban farmers | |  |

1 Potschin-Young, M., Haines-Young, R., Görg, C., Heink, U., Jax, K., and Schleyer, C. (2018). Understanding the role of conceptual frameworks: Reading the ecosystem service cascade. *Ecosyst. Serv.* 29, 428–440. doi:10.1016/j.ecoser.2017.05.015.

2 MA 2005. *Ecosystems and Human Well-being: Synthesis*. Washington, DC. Island Press.

3 Díaz, S., Demissew, S., Joly, C., Lonsdale, W. M., and Larigauderie, A. (2015). A Rosetta Stone for Nature’s Benefits to People. *PLoS Biol.* 13, 1–8. doi:10.1371/journal.pbio.1002040.

4 TEEB – The Economics of Ecosystems and Biodiversity (2011). TEEB Manual for Cities: Ecosystem Services in Urban Management. www.teebweb.org

Appendix 1 (*cont*)

| **Stakeholders** | **Description** | **Adapted from** |
| --- | --- | --- |
| Urban farmers | refers to those who benefit directly from UA. They are part of the production phase in the value chain farming at home or community gardens. | Hauck et al. 2016; Romero-Duque et al.2020 |
| Intermediates and external | refers to groups who are part of the value chain involved in the production phase (different to urban farmers, e.g. inputs), transport, processing, market, final consumers, entreprises |
| Policy makers and managers | refers to groups implicated in the public governance at different scales (national, regional, local) |
| Institutions | refers to groups who act as intermediates of funds, training or information different to public managers: NGOs, international agencies, media, academy, entreprises (no involved in the value chain) |
| Bunders | refers to groups who are affected negatively by UA (no used in this study) |

Haucks, J., Schmidt, J. and Werner, A. (2016). Using social network analysis to identify key stakeholders in agricultural biodiversity governance and related land-use decision at regional and local level. *Ecol, Soc*. 21(2), 49. doi.org/10.5751/ES-08596-210249

Romero-Duque, L. P., Trilleras, J. M., Castellarini, F., and Quijas, S. (2020). Ecosystem services in urban ecological infrastructure of Latin America and the Caribbean: How do they contribute to urban planning? *Sci. Total Environ.* 728, 138780. doi:10.1016/j.scitotenv.2020.138780.

Appendix 2

1.- Abud, G. M. B., Lopes, M. L. B., Do Socorro Silva Corrêa, R., and Almeida, R. H. C. (2019). Urban and peri-urban agriculture: Potentialit y and limitations for the development of Benevides, Brazil. *Rev. em Agronegocio e Meio Ambient.* 12, 1395–1416. doi:10.17765/2176-9168.2019v12n4p1395-1416.

2.- Alarcón-Rodríguez, M. L., Chamy, M. D., Fernández-Castillo, S. V., and Soto-Abarzúa, J. (2019). Agroecological practices in rururban lands of the Concepción metropolitan area. Contributions from social and solidarity economy to urban sustainability. *Urbano* 22, 42–63. doi:10.22320/07183607.2019.22.39.03.

3.- Alban, R. E., Arteaga, M. I., and Herrera, F. F. (2017). Urban agriculture in caracas: Diagnosis of agro-productive spaces from a socio-ecological perspective | La agricultura urbana en caracas: Diagnóstico de los espacios agroproductivos desde una perspectiva socioecológica*. *Cuad. Desarro. Rural* 14, 1–19.

4.- Alomía-Lucero, J., Castro-Bedriñana, J., and Chirinos-Peinado, D. (2020). Rooftop urban agriculture model with two tomato varieties (Lycopersicum esculentum Mill) and toppings in the high jungle – Peru. *Adv. Sci. Technol. Eng. Syst.* 5, 446–450. doi:10.25046/aj050157.

5.- Amaral, C. N. do, and Guarim Neto, G. (2008). Os quintais como espaços de conservação e cultivo de alimentos: um estudo na cidade de Rosário Oeste (Mato Grosso, Brasil). *Bol. do Mus. Para. Emílio Goeldi. Ciências Humanas* 3, 329–341. doi:10.1590/s1981-81222008000300004.

6.- Amato-Lourenço, L. F., Buralli, R. J., Ranieri, G. R., Hearn, A. H., Williams, C., and Mauad, T. (2021). Building knowledge in urban agriculture: the challenges of local food production in São Paulo and Melbourne. *Environ. Dev. Sustain.* 23, 2785–2796. doi:10.1007/s10668-020-00636-x.

7.- Avila-Sanchez, H. (2019). Agricultura Urbana y Periurbana. Reconfiguraciones territoriales y potencialidades en torno a los sistemas alimentarios urbanos. *Investig. Geográficas*. doi:10.14350/rig.59785.

8.- Azevedo, F. F., Perxacs, H., and Alió, M. A. (2020). Social Dimension of Urban and Periurban Agriculture. *Mercator* 19, 1–16. doi:10.4215/rm2020.e19005.

9.- Batitucci, T. D. O., Cortines, E., Almeida, F. S., and De Almeida, Â. A. (2019). Agriculture in urban ecosystems: A step to cities sustainability. *Ambient. e Soc.* 22, 0–3. doi:10.1590/1809-4422ASOC0277R3VU19L4AO.

10.- Bausch, J. C., Eakin, H. C., and Lerner, A. M. (2018). Adaptation for whom to what? Challenges and opportunities in agriculture-urban collaboration for climate change adaptation. *Urban B. Ser.*, 299–324. doi:10.1007/978-3-319-65003-6_15.

11.- Bellenda, B., Galván, G., García, M., Gazzano, I., Gepp, V., Linari, G., et al. (2018). Agricultura urbana agroecológica: más de una década de trabajo de Facultad de Agronomía (Udelar) junto a diversos colectivos sociales. *Agric. urbana Agroecol. más una década Trab. Fac. Agron. junto a Divers. Colect. Soc.* 22, 140–151. doi:10.31285/agro.22.1.15.

12.- Bellows, A. C., Alcaraz, G. V., and Vivar, T. (2010). Gardening as tool to foster health and cultural identity in the context of international migration: Attitudes and constraints in a female population. *Acta Hortic.* 881, 785–792. doi:10.17660/ActaHortic.2010.881.129.

13.- Benavente Cárdenas, C., Camargo Salcedo, P., Sarmiento Sarmiento, G., and Mena Chacón, L. (2018). Evaluación del desarrollo de la agricultura periurbana y propuesta de gestión integral en el distrito de Cayma, Arequipa, Perú. *Idesia (Arica)*, 0–0. doi:10.4067/s0718-34292018005001101.

14.- Boué, C., López Ridaura, S., Rodríguez Sánchez, L. M., Hellin, J., and Fuentes Ponce, M. (2018). Local dynamics of native maize value chains in a peri-urban zone in Mexico: The case of San Juan Atzacualoya in the state of Mexico. *J. Rural Stud.* 64, 28–38. doi:10.1016/j.jrurstud.2018.09.014.

15.- Bradley, P. and Marulanda, C. (2000). Simplified hydroponics to reduce global hunger. *Acta Hort* 554, 289-295.

16.- Branco, M. C., de Liz, R. S., Alcântara, F. A., Martins, H. A. G., and Hanson, J. C. (2011). Community Supported Agriculture: Could the experience of American farmers be useful to Brazilian urban farmers? *Hortic. Bras.* 29, 43–49. doi:10.1590/s0102-05362011000100008.

17.- Cabrera Verdezoto, R. P., Vera Oyarzún, M. B., Echeverría Pezoa, R. A., and Amtmann Moyano, C. A. (2013). Agricultura urbana en la ciudad de Valdivia, Chile. Un proceso de asentamiento. *Idesia* 31, 53–60. doi:10.4067/S0718-34292013000400007.

18.- Cabrera Verdezoto, R. P., Vera Oyarzún, M. B., Echeverría Pezoa, R. A., Amtmann Moyano, C. A., and Pinochet Tejos, D. (2017). Caracterización de los agricultores urbanos en la comuna de Valdivia, Región de los Ríos, Chile. *Idesia* 35. doi:10.4067/S0718-34292017005000012.

19.- Calderón Cisneros, A. (2016). Agricultura urbana familiar en una ciudad media en Chiapas. Implicaciones para la sustentabilidad urbanaFamily urban agriculture in an average city in Chiapas. Implications for urban sustainability. *Agric. urbana Fam. en una Ciudad media en Chiapas. Implicaciones para la sustentabilidad urbanaFamily urban Agric. an Aver. city Chiapas. Implic. urban Sustain.* 26, 101–129.

20.- Calderón Cisneros, A., and Soto Pinto, L. (2014). Transformaciones agrícolas en el contexto periurbano de la ciudad de San Cristóbal de Las Casas, Chiapas. *LiminaR Estud. Soc. y Humanísticos* 12, 125–143. doi:10.29043/liminar.v12i1.329.

21.- Cantor, K-M. (2010). Agricultura urbana: elementos valorativos sobre su sostenibilidad. *Cuadernos de Desarrollo Rural 7*, (65): 61-87

22.- Carneiro, B., Fátima, M. De, Feitosa, M. A., Santos, P., Veloso, A., and Oliveira, M. De (2011). ESPAÇO INTRA-URBANO DE MONTES CLAROS , MG.

23.- Carneiro, M. S., and Braga, C. L. (2020). Alternativo versus convencional: uma análise da inserção de agricultores familiares periurbanos em circuitos de comercialização no município de São Luís/MA. *Redes* 25, 545–569. doi:10.17058/redes.v25i2.14857.

24.- Caro, F.B., Hernández, E. Y. R., González, K. D., Fajardo, K. D. G., Viveros, S. S. Torres, R.M. (2018). Nivel de seguridad alimentaria en beneficiarios de comedores comuntarios del programa Cruzada Nacional contra el Hambre (México). *Rev Esp Nutr Comunitaria*. 24, 117- 124.

25.- Cerón-Palma, I., Sanyé-Mengual, E., Oliver-Solà, J., Montero, J.-I., Ponce-Caballero, C., and Rieradevall, J. (2013). Towards a green sustainable strategy for social neighbourhoods in Latin America: Case from social housing in Merida, Yucatan, Mexico. *Habitat Int.* 38, 47–56. doi:10.1016/j.habitatint.2012.09.008.

26.- Chiappe Hernández, M. (2019). Evaluacion de indicadores de sostenibilidad para la agricultura urbana. *Acta Hortic.* 1246, 83–91. doi:10.17660/ActaHortic.2019.1246.12.

27.- Chierrito-Arruda, E., Yaegashi, S. F. R., Paccola, E. A. de S., Grossi Milan, R. . (2018). Environmental perception and affectivity: experiences in a community garden. *Ambiente & Sociedade.* *Featur. Top. n* 21, 1232.

28.- Chou, A. Y., Calves Somoza, E., Terán Vidal, Z., Ramírez Medina, A., Leyva Galán, Á., Pavón Rosales, M. I., et al. (2014). Flowers production in the urban agriculture of San Jose de las Lajas, Cuba Produccion de flores en la agricultura urbana de San Jose de las Lajas, Cuba. *Cultiv. Trop.* 35, 94–100.

29.- Claghorn, J., Orsini, F. M., Restrepo, C. A. E., and Werthmann, C. (2016). Rehabitar la Montaña: Strategies and processes for sustainable communities in the mountainous periphery of Medellín. *Urbe* 8, 42–60. doi:10.1590/2175-3369.008.001.SE03.

30.- Coelho, D. E. P., and Bógus, C. M. (2016). Vivências de plantar e comer: A horta escolar como prática educativa, sob a perspectiva dos educadores. *Saude e Soc.* 25, 761–771. doi:10.1590/S0104-12902016149487.

31.- Comassetto, H., B., Solalinde, Z., Gabriela, P., Souza, R. De, Vicente, J., Abdala, Z., et al. (2013). Nostalgi , anticonsumo simbólico e bem-estar : a agricultura urbana. *Revista de Administração de Empresas.* 53 (4), 364-375.

32.- Corrales, L. I. B., Arango, D. A. G., Sepúlveda-Aguirre, J., Gutiérrez, C. A. E., and Agudelo, L. C. A. (2018). Comparative study of germination percentage for Lactuca sativa varieties: Sustainable orchards in urban environments. *Prod. y Limpia* 13, 83–91. doi:10.22507/pml.v13n1a10.

33.- Costa, C. G. A., Garcia, M. T., Ribeiro, S. M., Salandini, M. F. de S., and Bógus, C. M. (2015). Hortas comunitárias como atividade promotora de saúde: Uma experiência em Unidades Básicas de Saúde. *Cienc. e Saude Coletiva* 20, 3099–3110. doi:10.1590/1413-812320152010.00352015.

34.- Costa, S., and Marinelo, S. (2019). O visível e o invisível da agricultura urbana em São José dos Campos, SP. *GOT - J. Geogr. Spat. Plan.*, 99–123. doi:10.17127/got/2019.16.005.

35.- Curiel, C. (2019). Prácticas localizadas de producción y consumo en la ciudad. Relaciones sociales a través de la alimentación no convencional en Oaxaca, México. *Soc. y Ambient.*, 227–251. doi:10.31840/sya.v0i21.2047.

36.- da Costa Ferreira, D. A., da Silva Dias, n., da cCosta Ferreira, A. K., Barbosa, E., Lima Vasconcelos, C., de Sousa Junior, F. S., Nascimento Porto, V. C., et al. (2018). Effect of organic residue compost made from household waste, plant residues and manure on the growth of lettuce. *Rev. Colomb. Ciencias Hortícolas* 12, 464–474. Available at: http://www.scielo.org.co/scielo.php?script=sci_arttext&pid=S2011-21732018000200464&lng=en&nrm=iso&tlng=es.

37.- da Cruz, S. M. S., Cruz, P. V., and De Macêdo Vieira, A. C. (2018). Vision paper: Challenges and opportunities of social computing in urban agriculture in global north and south countries. in *CEUR Workshop Proceedings*.

38.- da Cunha, M. A., Paraguassú, L. A. A., Assis, J. G. de A., Silva, A. B. de P. C., and Cardoso, R. de C. V. (2020). Urban gardening and neglected and underutilized species in Salvador, Bahia, Brazil. *J. Ethnobiol. Ethnomed.* 16, 1–16. doi:10.1186/s13002-020-00421-0.

39.- Danilevicz, V. M. (2020). Sowing: a Cartography in Primary Health Care. *Psicol. e Soc.* 32, 1–10. doi:10.1590/1807-0310/2020V32218672.

40.- Delpino-Chamy, M., Alarcon, M., Fernández, S., and Soto, J. (2019). Methodology to identify and assess AG roecological practices in metropo litan areas. Case study, concepción, Chile. *Int. J. Des. Nat. Ecodynamics* 14, 119–130. doi:10.2495/DNE-V14-N2-119-130.

41.- de Medeiros, N. S. A., do Carmo, D. L., Priore, S. E., Santos, R. H. S., and Pinto, C. A. (2019). Food security and edible plant cultivation in the urban gardens of socially disadvantaged families in the municipality of Viçosa, Minas Gerais, Brazil. *Environ. Dev. Sustain.* 21, 1171–1184. doi:10.1007/s10668-017-0078-7.

42.- de Souza, J. S., de Cassia Vieira Cardoso, R., Paraguassú, L. A. A., and dos Santos, S. F. (2019). The experience of community urban gardens: Social organization and food security. *Rev. Nutr.* 32, 1–11. doi:10.1590/1678-9865201932E180291.

43.- Dias da-Silva, A. (2020). A A construção de políticas públicas para a sustentabilidade urbana. *Rev. Geográfica América Cent.* 2, 33–61. doi:10.15359/rgac.65-2.2.

44.- Dieleman, H. (2017). Urban agriculture in Mexico City; balancing between ecological, economic, social and symbolic value. *J. Clean. Prod.* 163, S156–S163. doi:10.1016/j.jclepro.2016.01.082.

45.- Dorado, A.J.C., Velasco, S, M., Ceron, F.A.P. (2017) Evaluación de una práctica de agricultura urbana con botellas pet en el municipio de Popayán. *Biotecnología en el Sector Agropecuario y Agroindustrial*. 15 (2), 57-84.doi: 10.18684/BSAA(15)57-64

46.- Eandi, M. A., Dezzotti, L., and Butinof, M. (2021). Health care and exposure to pesticides in periurban horticulture: The case of the green belt of the city of Cordoba, Argentina. *Cienc. e Saude Coletiva* 26, 1575–1584. doi:10.1590/1413-81232021264.27922018.

47.- Ebel, R. (2020). Chinampas: An urban farming model of the aztecs and a potential solution for modern megalopolis. *Horttechnology* 30, 13–19. doi:10.21273/HORTTECH04310-19.

48.- Eichemberg, M. T., and Amorozo, M. C. de M. (2013). Contributions of the old urban homegardens for food production and consumption in Rio Claro, Southeastern Brazil. *Bol. do Mus. Para. Emílio Goeldi. Ciências Humanas* 8, 745–755. doi:10.1590/s1981-81222013000300015.

49.- Emperaire, L. and Ludivine, E. (2008). A cidade, um foco de diversidade agrícola no Rio Negro (Amazonas, Brasil)? *Boletim do Museu Paraense Emílio Goeldi*. *Ciências Humanas*, 3 (2), 195-211.

50.- Ermini, P.V., Delprino, M.R. Giobellina, B. (2017). Mapeo de laagricultura urbana y periurbana en el área metropolitana Santa Rosa-Toay: aproximaciones metodológicas para la lectura territorial. *Revista de Investigaciones Agropecuarias*. 43 (3), 280-290.

51.- FAO (2014). *Growing Greener Cities in Latin America and the*. doi:10.1017/CBO9781107415324.004.

52.- FAO (2014). La Agricultura Urbana y Periurbana en América Latina y el Caribe : Compendio de estudios de casos Urban and Peri-urban agriculture in Latin America and the Caribbean : Compendium of case studies Antigua and Barbuda Brief overview of the sector. 295. Available at: http://www.fao.org/ag/agp/greenercities/pdf/compendium.pdf.

53.- Fecondini, M., Casati, M., Dimech, M., Michelon, N., Orsini, F., and Gianquinto, G. (2009). *Improved cultivation of lettuce with a low cost soilless system in indigent areas of Northeast Brazil*. doi:10.17660/ActaHortic.2009.807.73.

54.- Feito, C. (2017). Visibilización y valorización de la agricultura familiar periurbana. Intervenciones de políticas públicas en el partido de La Matanza. *Mundo Agrar.* 18, 055. doi:10.24215/15155994e055.

55.- Feito, M. C. (2018). Problemas y desafíos del periurbano de Buenos Aires. *Estud. Socioterritoriales* 24, 0–0.

56.- Feola, G., Suzunaga, J., Soler, J., and Wilson, A. (2020). Peri-urban agriculture as quiet sustainability: Challenging the urban development discourse in Sogamoso, Colombia. *J. Rural Stud.* 80, 1–12. doi:10.1016/j.jrurstud.2020.04.032.

57. Ferigollo, D., Kirsten, V. R., Heckler, D., Figueredo, O. A. T., Perez-Cassarino, J., and Triches, R. M. (2017). Products purchased from family farming for school meals in the cities of Rio Grande do Sul. *Rev. Saude Publica* 51, 6. doi:10.1590/S1518-8787.2017051006648.

58.- Fernandez, A. C. F., and Filho, A. C. B. (2019). Agricultura familiar urbana: Limites da política pública e das representações sociais. *Cidades* 39, 141–145. doi:10.15847/citiescommunitiesterritories.dec2019.039.art06.

59.- Fernández, K. G., Moreno-Calles, A. I., Casas, A., and Blancas, J. (2020). Contributions of urban collective gardens to local sustainability in Mexico City. *Sustain.* 12. doi:10.3390/su12187562.

60.- Furlan, M. R., Brisola, E. M. A., Soares Neto, J. A. R., and Ribeiro, S. L. S. (2017). A reprodução de gênero no cuidado dos quintais no Brasil. *Agroalimentaria* 23, 159–173.

61.- Fuzinatto, N. M., and Catarina, S. (1983). Agricultura Urbana Como Recurso Competitivo Em Serviços Alimentares : Uma Avaliação Por Meio Da Teoria Da Visão Baseada Em Recursos Urban Farming As Competitive Resource in Food Services : an Evaluation Through the Resource-Based View Theory Servicios Ali. 0–2.

62.- Fuzinatto, N. M., Danielli, J. A., Preschlak, D., and Fischer, A. (2021). Análise de viabilidade financeira da produção orgânica de morangos para comercialização local. *Rev. em Agronegócio e Meio Ambient.* 14, e006916. doi:10.17765/2176-9168.2021v14n1e006916.

63.- Gianquinto, G., Orsini, F., Michelon, N., Da Silva, D. F., and De Faria, F. D. (2007). Improving yield of vegetables by using soilless micro-garden technologies in peri-urban area of north-east Brazil. *Acta Hortic.* 747, 57–65. doi:10.17660/ActaHortic.2007.747.4.

64.- Giuffré, L., Ratto, S., Marbán, L., Schonwald, J., and Romaniuk, R. (2005). Riesgo por metales pesados en horticultura urbana. *Cienc. del Suelo* 23, 101–106.

65.- Gold, M. (2014). Peasant, Patriot, Environmentalist: Sustainable development discourse in Havana. *Bull. Lat. Am. Res.* 33, 405–418. doi:10.1111/blar.12175.

66.- Gomes, J. F. B., Gomes, R. S. B., and Souza, A. O. (2019). The multifunctionality of urban horticulture and its integration with the city ecosystem: A brief review of concepts and the case of São Luís. *Hortic. Bras.* 37, 252–259. doi:10.1590/s0102-053620190301.

67.- Guerrero, P. D. H., Mata, L. M. M., Madrigal, P. B., and Criollo, J. J. M. (2019). Production and economic analysis of a pop-up farm in Mexico city. *Int. J. Des. Nat. Ecodynamics* 14, 41–51. doi:10.2495/DNE-V14-N1-41-51.

68.- Hearn, A. H., Mauad, T., Williams, C., Amato-Lourenço, L. F., and Reis Ranieri, G. (2020). Digging up the past: urban agriculture narratives in Melbourne and São Paulo. *J. Urban.* doi:10.1080/17549175.2020.1828144.

69.- Hernández, L., Pino, M. D. L. Á., Cálves, E., Dominí, M. E., and Terán, a R. Z. (2005). Y Tecnologías De Cultivos En El Consejo Popular Norte Y Sur Del Municicipio De San José De Las Lajas ,. 26, 11–16. Available at: <http://www.redalyc.org/articulo.oa?id=193216156002>.

70.- Hernández, L. (2006) la agricultura urbana y caracterización de sus sistemas productivos y sociales, como vía para la seguridad alimentaria en nuestras ciudades *Cultivos Tropicales*, 27, (2), 13-25.

71.- Hernández, L., Pino, M de los A., Rettry, E. (2007) Aplicación de métodos participativos para la diversificación de cultivos en la agricultura urbana*. Cultivos Tropicales,* 28(4), 9-18.

72.- Hernández, L., Pino, M de los A., Varelka, M. (2010). Experimentación endógena asociada a la agricultura urbana de las provincias Ciudad de la Habana y la Habana. *Cultivos Tropicales*, 31(2), 5-11.

73.- Hernández, G., Pérez, J., Martínez, R., López, T. (2010) Respuesta productiva del guayabo al manejo del agua en condiciones de agricultura urbana. *Rev. Ciencias Técnicas Agropecu.* 19(3), 1-6.

74.- Izquierdo, J. (2007). Simplified hydroponics: A tool for food security in Latin America and the Caribbean. *Acta Hortic.* 742, 67–74. doi:10.17660/ActaHortic.2007.742.9.

75.- Lafontaine-Messier, M., Gélinas, N., and Olivier, A. (2016). Profitability of food trees planted in urban public green areas. *Urban For. Urban Green.* 16, 197–207. doi:10.1016/j.ufug.2016.02.013.

76.- Lattuca, A., and Terrile, R. (2014). El Programa de Agricultura Urbana de la Municipalidad de Rosario, Argentina. *Hábitat y Soc.*, 95–104. doi:10.12795/habitatysociedad.2013.i6.06.

77.- Losada, H., Vieyra, J., Soriano, R., Bennett, R., Cortés, J., and Zavaleta, P. (2001). Assessing the sustainability of a terraced agroecosystem for production of nopal vegetable (Opuntia ficus-indica) in metropolitan Mexico City. *Am. J. Altern. Agric.* 16, 98–105. doi:10.1017/s0889189300009000.

78.- Losada, H. R., Vargas, J. M., Cortés, J., Vieyra, J. E., Luna, L., Alemán, V., et al. (2011). Urban agriculture in the Metropolitan area of Mexico City. *Agric. Res. Updat.* 19, 127–155.

79.- Lozano, G. del A., and Nava-Tablado, M. E.. (2019). Limitaciones técnico-productivas y socioeconómicas para la adopción de la agricultura urbana. El caso de la red de agricultura urbana y periurbana de Xalapa, Veracruz. *Tropical and Subtropical Agroecosystems*. 22, 97-106.

80.- Lugo-Morin, D. R. (2019). Residual agriculture: some implications for its discussion *Ciencia y Sociedad.* 35 (4)

81. Maas, L., Malvestiti, R., and Gontijo, L. A. (2020). Results of lack of policies to encourage urban organic farming: A case study in two Brazilian cities. *Cad. Saude Publica* 36, 1–12. doi:10.1590/0102-311X00134319.

82.- Machado, A. L., Butinof, M., Eandi, M. A., Portilla, A. M., Fernandez, R. A., Soria, V., et al. (2017). Vulnerabilidad y riesgo por plaguicidas en horticultura del cinturón verde en Córdoba, Argentina. *Rev. Fac. Nac. Salud Pública* 35, 99–110. doi:10.17533/udea.rfnsp.v35n1a11.

83.- Madaleno, I. (2000). Urban agriculture in Belem, Brazil. *Cities* 17, 73–77. doi:10.1016/S0264-2751(99)00053-0.

84.- Madaleno, I. M. (2002). Urban agriculture, an environmentally sustainable land use - Case studies from Europe, Latin America and Africa. *Adv. Archit. Ser.* 14, 961–969.

85.- Madaleno, I. M., and Armijo, G. (2004). Agriculture urbana en metrópolis iberoamericanas: Estudio de casos en Santiago de Chile y Lisboa, Portugal. *Investig. Geogr.* 54, 36–54. doi:10.14350/rig.30131.

86.- Madaleno, I. M. (2011). Plantas da medicina popular de São Luís, Brasil. *Bol. do Mus. Para. Emílio Goeldi. Ciências Humanas* 6, 273–286. doi:10.1590/s1981-81222011000200002.

87.- Madaleno, I. M. (2012). Cultivating our cities. *WIT Trans. Ecol. Environ.* 162, 183–192. doi:10.2495/EID120171.

88.- Merçon, J., Escalona Aguilar, M., Noriega Armella, M., Figueroa Núñez, I., Atenco Sánchez, A., and González Méndez, E. (2012). Cultivando la educación agroecológica: el huerto colectivo urbano como espacio educativo. *Rev. Mex. Investig. Educ.* 17, 1201–1224.

89.- Molina Posada, D. V., Muñoz-Duqeu, L. A. and Molina Jaramillo, A. N.(2019). Agricultura urbana, bienestar subjetivo y actitudes ambientales en el colectivo Agroarte. Estudio de caso en la comuna 13, Medellín 1. *Revista Virtual Universidad Católica del Norte*, 56, 89-108.

90.- Montes R, C., and Gómez G, A. (2011). Valuation of *Sechium edule* as an alimentary alternative and recuperation of bonds to the country. *Biotecnol. en el Sect. Agropecu. y Agroindustrial* 9, 198–209.

91.- Moreno-Gaytán, S. I., Jiménez-Velazquez, M. A., and Hernández-Juárez, M. (2019). Sustentabilidad y agricultura urbana practicada por mujeres en la Zona Metropolitana de Ciudad de México, Valle de Chalco Solidaridad. *Estud. Soc. Rev. Aliment. Contemp. y Desarro. Reg.* 29, 1–33. doi:10.24836/es.v29i54.795.

92.- Muñoz-Rodríguez, M., Fernández-González, C., Aguilar-Gallegos, N., and González-Santiago, M. V. (2020). The primacy of politics in public food security policies: The case of home gardens. *Sustain.* 12. doi:10.3390/su12104316.

93.- Nagib, G. (2019). Processes and materialization of urban agriculture as activism in the city of São Paulo: the case of the Corujas Community Garden. *Cad. Metrópole PUC-SP* 21, 715–739. Available at: http://www.teses.usp.br/teses/disponiveis/8/8136/tde-18082016-124530/pt-br.php.

94.- Nagib, G., and Nakamura, A. C. (2020). Urban agriculture in the city of São Paulo: New spatial transformations and ongoing challenges to guarantee the production and consumption of healthy food. *Glob. Food Sec.* 26, 100378. doi:10.1016/j.gfs.2020.100378.

95.- Niederle, P. A., Schneider, T. C., and Schubert, M. N. (2018). Comida relacional : produção de sentidos e sociabilidades nas práticas alimentares da quinta da videira. *Rev. Theomi*, 138–149.

96.- Olivares Reumont, S. (2013). Niveles de cadmio, plomo, cobre y zinc en hortalizas cultivadas en una zona altamente urbanizada de la ciudad de la habana, Cuba. *Rev. Int. Contam. Ambient.* 29, 285–293.

97.- Oliveira, D., Martins, I., Carneiro, B., and Fátima, M. De (2012). Tradições Rurais Em Vidas Urbanas: a Agricultura Urbana No Bairro Vila Anália, Montes Claros/Mg. *Rev. Cerrados* 10, 101–127.

98.- Oliveira, A. C. N. de, and Santos, E. V. M. (2018). A importância da agricultura urbana: um estudo sobre o programa Eco Hortas Comunitárias no município de Campos dos Goytacazes – RJ. *Rev. Cerrados* 16, 51–68. doi:10.22238/rc24482692201816025168.

99.- Oliveira, E. A. A. Q., Nunes, L. L. M., and Moraes, M. B. de (2019). Características Socioeconômica e ambiental da Agricultura Urbana em Imperatriz-MA. *Redes* 24, 241–271. doi:10.17058/redes.v24i3.14105.

100.- Oliveira, R. L. M. de, Santos, I. V., Graciano, G. F., Cunha Libânio, A. A., Kelli de Oliveira, L., and Bracarense, L. dos S. F. P. (2021). A sustainable approach for urban farming based on city logistics concepts for local production and consumption of vegetables. *Res. Transp. Econ.* doi:10.1016/j.retrec.2021.101038.

101.- Orjuela, F. N. (2005). Participación laboral y autonomía femenina en un contexto de agricultura urbana. *Estud. Demográficos y Urbanos/El Col. México, A.C. México.* 20, 533–567.

102.- Orsini, F., Morbello, M., Fecondini, M., and Gianquinto, G. (2010). Hydroponic gardens: Undertaking malnutrition and poverty through vegetable production in the suburbs of lima, Peru. *Acta Hort*. 881. doi:10.17660/ActaHortic.2010.881.21.

103.- Ortiz, R., Vera, C., and Leyva, A. (2001). Diagnóstico específico en huertos urbanos del Suroeste de ciudad de la Habana. Available at: https://bit.ly/3s5ZRfp.

104.- Ortiz, R., and Vera, C. (2001). Estudio de la biodiversidad en huertos agrícolas urbanos de dos Municipios de Ciudad de La Habana . *Cultivos Tropicales*. 22, 17–24.

105.- Paviotti-Fischer, E., Lopes-Torres, E. J., Santos, M. A. J., Brandolini, S. V. P. B., and Pinheiro, J. (2019). Xiphidiocercariae from naturally infected Lymnaea columella (Mollusca, gastropoda) in urban area: Morphology and ultrastructure of the larvae and histological changes in the mollusc host. *Brazilian J. Biol.* 79, 446–451. doi:10.1590/1519-6984.182501.

106.- Peralta-González, C. A., Mondragón-Ríos, R., and Bello-Baltazar, E. (2019). Espacios socioculturales y mecanismos de comunicación para el aprendizaje y apropiación de conocimientos sobre el uso de plantas medicinales y gastronómicas en San Cristóbal de Las Casas, Chiapas. *Estud. Soc. Rev. Aliment. Contemp. y Desarro. Reg.* 29. doi:10.24836/es.v29i53.613.

107.- Pérez Fernández, A. R., Ruiz Morales, M., Lobato Calleros, M. O., Valera, E. P., and Rodríguez Salinas, P. (2018). Sustrato Biofísico Para Agricultura Protegida Y Urbana A Partir De Compost Y Agregados Provenientes De Los Residuos Sólidos Urbanos. *Rev. Int. Contam. Ambient.* 34, 383–394. doi:10.20937/RICA.2018.34.03.02.

108.- Pescio, F. J. (2020). Balance entre la producción de una huerta agroecológica y la demanda nutricional de una familia tipo en el Área Metropolitana de Buenos Aires. *Rev. Investig. Agropecu.* 46, 116–122.

109.- Petry, C. (2017). As urban citizens, how to achieve autonomy and food security? *Acta Hortic.* 1189, 423–426. doi:10.17660/ActaHortic.2017.1189.82.

110.- Pinilla, K., Hoinle, B., Mahecha-Groot, A., and Cepeda, J. (2018). Mapping the agrodiversity in bogotá - The platform mapeo agroecobogotá. *Int. J. Des. Nat. Ecodynamics* 13, 407–414. doi:10.2495/DNE-V13-N4-407-414.

111.- Pino, M. de los A., Hernández, L., Dominí, M. E., Ramírez, A., Terán, Z., and Calves, E. (2007). Cultivos tropicales revista cuatrimestral. *Cultiv. Trop.* 28, 13–19. Available at: http://www.redalyc.org/articulo.oa?id=193217731002.

112.- Prain, G., Gonzales, N., Arce, B., and Tenorio, J. (2010). Organic vegetable production on the peri-urban interface: Helping low income producers access high value markets in Lima, Peru. *Acta Hortic.* 881, 117–123. doi:10.17660/ActaHortic.2010.881.11.

113.- Ribeiro, S. M., Azevedo, E. de, Pelicioni, M. C. F., Bógus, C. M., and Pereira, I. M. T. B. (2012). Agricultura urbana agroecológica - estratégia de promoção da saúde e segurança alimentar e nutricional TT - Agroecological urban agriculture - strategy for health promotion and food and nutrition security. *Rev. bras. promoç. saúde* 25, 381–388. Available at: http://ojs.unifor.br/index.php/RBPS/article/view/2269/2496

114.- Ribeiro, S. M., Bógus, C. M., and Watanabe, H. A. W. (2015). Agroecological urban agriculture from the perspective of health promotion | Agricultura urbana agroecológica na perspectiva da promoção da saúde. *Saude e Soc.* 24, 730–743. doi:10.1590/S0104-12902015000200026..

115.- Rodríguez-Delfín, A. (2012). Advances of hydroponics in Latin America. *Acta Hortic.* 947, 23–32. doi:10.17660/ActaHortic.2012.947.1.

116.- Rojas, M., Gómez, T., Felipe, V., Tovar, O., Fernando, D., Vrolg, R. I., et al. (2008). XUEDQD.

117.- Rosa, V., and Paulo, P. (2011). Políticas Públicas Em Agricultura Urbana E Periurbana No Brasil. *Rev. Geográfica América Cent.* 2, 1–17.

118.- Salazar-Moreno, R., Fitz-Rodríguez, E., López-Cruz, I. L., Aguilar-Rojano, A., Schmidt, U., and Dannelh, D. (2018). Urban agriculture in Mexico City. *Acta Hortic.* 1215, 191–196. doi:10.17660/ActaHortic.2018.1215.36.

119.- Sant’Anna de Medeiros, N., do Carmo, D. L., Priore, S. E., and Santos, R. H. S. (2020). Diverse food in urban gardens in the promotion of food and nutrition security in Brazil: a review. *J. Sci. Food Agric.* 100, 1383–1391. doi:10.1002/jsfa.10127.

120.- Sarkis-Costa, R. , Silva Pereira, R., Silva Costa, E. (2016). Educação ambiental por meio de horta comunitária: estudo em uma escola pública da cidade de São Paulo. Revista Científica Hermes. 16, 246-270.

121.- Sastriques, O., and Gallego, O. (2007). El riego con aguas de mala calidad en la agricultura urbana. Aspectos a considerar. I. Aguas salinas o alcalinas. *Rev. Ciencias Técnicas Agropecu.* 16, 25–27.

122.- Schiavo, C. (2009). Empoderamiento y acción colectiva en produc- ciones agroalimentarias con identidad territorial. 9–50.

123.- Shillington, L. J. (2013). Right to food, right to the city: Household urban agriculture, and socionatural metabolism in Managua, Nicaragua. *Geoforum* 44, 103–111. doi:10.1016/j.geoforum.2012.02.006.

124.- Silva, A. H. S., De Sousa, E. A., Ducoux, A. B. I., Gonçalves, A. P., De Melo, M. D. G. P., Da Costa, A. D. O., et al. (2018). Peri-urban allotment gardens: A successful experience in Recife/Pernambuco, Brazil. *Acta Hort*. 1215. doi:10.17660/ActaHortic.2018.1215.40.

125.- Siviero, A., Delunardo, T. A., Haverroth, M., Oliveira, L. C., and Mendonça, A. M. S. (2011). Cultivo de Espécies Alimentares em Quintais Urbanos de Rio Branco, Acre, Brasil

126.- Siviero, A., Delunardo, T. A., Haverroth, M., Oliveira, L. C., and Mendonça, A. M. S. (2012). Plantas medicinais em quintais urbanos de Rio Branco, Acre. *Rev. Bras. Plantas Med.* 14, 598–610. doi:10.1590/S1516-05722012000400005.

127.- Siviero, A., Delunardo, T. A., Haverroth, M., De Oliveira, L. C., Roman, A. L. C., and Da Silva Mendonça, Â. M. (2014). Plantas ornamentais em quintais urbanos de Rio Branco, Brasil. *Bol. do Mus. Para. Emilio GoeldiCiencias Humanas* 9, 797–813. doi:10.1590/1981-81222014000300015.

128.- Toral, A., López Collado, C., and Gallardo López, F. (2016). Factores que influyen en la práctica de la horticultura periurbana: caso de una ciudad en el estado de Veracruz, México. *Estud. Soc. (Hermosillo, Son.)* 24–25, 205–228.

129.- Torquati, B., Giacchè, G., Marino, D., Pastore, R., Mazzocchi, G., Niño, L., et al. (2018). *Urban farming opportunities: A comparative analysis between Italy and Argentina*. doi:10.17660/ActaHortic.2018.1215.37.

130.- Valent, J. Z., Oliveira, L. De, and Valent, V. D. (2017). Agricultura urbana: o desenvolvimento de um projeto social. *DRd - Desenvolv. Reg. em debate* 7, 4. doi:10.24302/drd.v7i2.1427.

131.- Vannozzi Brito, V., and Borelli, S. (2020). Urban food forestry and its role to increase food security: A Brazilian overview and its potentialities. *Urban For. Urban Green.* 56, 126835. doi:10.1016/j.ufug.2020.126835.

132.- Vansteenkiste, J. (2014). Considering the ecohealth approach: Shaping Haitian women’s participation in urban agricultural projects. *Dev. Pract.* 24, 18–29. doi:10.1080/09614524.2014.867307.

133.- Vega Castro, D. A. (2015). Evaluación de la producción de papa criolla Solanum phureja clon paisa en contenedores de polietileno de alta densidad bajo el marco de agricultura urbana. *Luna Azul,* 40, 35-46.

134.- Vega Castro, D. A., and Salamanca Rivera, Á. P. (2015). Contenidos de plomo en acelga común *Beta vulgaris* L., producida en le contexto de la agricultura urbana (Bogotá, Colombia). *Luna Azul*, 44–53. doi:10.17151/luaz.2016.42.5.

135.- Veloso, A., Oliveira, M. De, Carneiro, B., and Fátima, M. De (2009). Agricultura Urbana: Funções De Identidade, Transmissão Dos Saberes E Da Cultura. *Rev. Cerrados* 7, 11–22.

136.- Vera O., B. (2009). Agricultura urbana y sustentabilidad en Valdivia, Chile. Una nueva alternativa microempresarial. *Urbano* 12, 7–12.

137.- Villares de Carvalho, I., and Nella Branduini, P. (2017). Patrimonio y agricultura urbana en Recife: Análisis y directrices para el barrio de Várzea. *Rev. Urbano* 20, 30–41. doi:10.22320/07183607.2017.20.36.03.

138.- Vorraber, L. B., Sebastián, M., Fernández, E., and Scófano, M. (2014). Ecología urbana: diseño de espacios productivos comunitarios y evaluación de condiciones del medio de crecimiento y asociación de especies Urban ecology: Design of communitarian productive areas and evaluation of environmental growing conditions and speci. *Multequina* 23, 65–74.

139.- Vuelta-Lorenzo, D. R.; Rizo-mustelier, M., Molina-lores, L. B., Bell-Mesa, T. (2014). Contribución a la soberanía alimentaria de la agricultura familiar en Santiago de Cuba. *Ciencia en su PC*, 4, 66-77.

140.- Wandscheer, E. A. R., and Medeiros, R. M. V. (2015). Agricultura urbana em Porto Alegre: dinâmicas socioeconômicas no espaço local. *Geosaberes Rev. Estud. Geoeducacionais* 6, 298–312.

141.- Wellington, M., Arruda, J., Pimentel da Silva, L., Barros Pinto, G. (2010). Tecnologias alternativas de produção vegetal em telhados verdes em áreas de interesse social. *Rev. Conex. UEPG* 6, 60–67.

142.- WinklerPrins, A. M. G. A., and de Souza, P. S. (2005). Surviving the city: Urban home gardens and the economy of affection in the Brazilian Amazon. *J. Lat. Am. Geogr.* 4, 107–126. doi:10.1353/lag.2005.0033.

143.- WinklerPrins, Antoinette; Oliveira, P. S. de S. (2010). Urban agriculture in Santarém , Pará , Brazil : diversity and circulation of cultivated plants in urban homegardens Agricultura urbana em Santarém , Pará , Brasil : diversidade e circulação de plantas cultivadas em quintais urbanos. *Bol. do Mus. Para. Emílio Goeldi. Ciências Humanas* 5, 571–585.

144.- Yagüe, J. L., Montes, A., and Morales, F. J. (2013). Evaluation of development projects: A process-centered approach in the Outskirts of Lima, Peru. *Cuad. Desarro. Rural* 10, 181–200.

145.- Yong, A., Calves, E. and Benítez, B. (2007). Caracterización De La Diversidad De Cultivos Con Vistas a La Adopción De Nuevas Especies Y/O Variedades De Flores De Corte En Diferentes Sistemas Productivos Del Municipio San José De Las Lajas. *Cultiv. Trop.* 28, 17–21.

146.- Yong, A., Calves, E., González, Y., Permuy, N., and Pavón, M. I. (2017). La conservación de alimentos parael fortalecimiento de la seguridad alimentaria a nivel loca. *Cultiv. Trop.* 38, 102–107. Available at: http://ediciones.inca.edu.cu.

147.- Zapata, V. Y. H., Zabala, F. J. V., Martina, M. A. M., González, A. M. S., and Vélez, M. E. (2020). Sociodemographic, cultural, environmental and agroecological characterization in order to adopt urban agriculture in the municipality of Tuluá, Colombia. *WSEAS Trans. Environ. Dev.* 16, 67–83. doi:10.37394/232015.2020.16.8.
